# Supplementary material for: Functionalized graphene oxide serves as a novel vaccine nano-adjuvant for robust stimulation of cellular immunity
Source: Royal Society of Chemistry journal article supplement (doi:10.1039/c5nr09208f), 2016-01-01
Supplement: c5nr09208f1.pdf [file c5nr09208f1.pdf]

## Supplementary Information

### Functionalized graphene oxide serves as a novel vaccine nano-adjuvant for robust stimulation of cellular immunity

Ligeng Xu <sup>a</sup>, Jian Xiang <sup>a</sup>, Ye Liu <sup>b</sup>, Jun Xu <sup>a</sup>, Yinchun Luo <sup>a</sup>, Liangzhu Feng <sup>a</sup>, Zhuang Liu <sup>a,\*</sup>, Rui Peng <sup>a,\*</sup>

<sup>a</sup> Institute of Functional Nano & Soft Materials (FUNSOM), Jiangsu Key Laboratory for carbon-based Functional Materials & Devices, Soochow University, Suzhou, 215123, P.R. China.

<sup>b</sup> CAS Key Laboratory for Biomedical Effects of Nanomaterials and Nanosafety, National Center for Nanoscience and Technology of China, Beijing, 100190, P.R. China

\* E-mail: [zliu@suda.edu.cn](mailto:zliu@suda.edu.cn), [rpeng@suda.edu.cn](mailto:rpeng@suda.edu.cn)

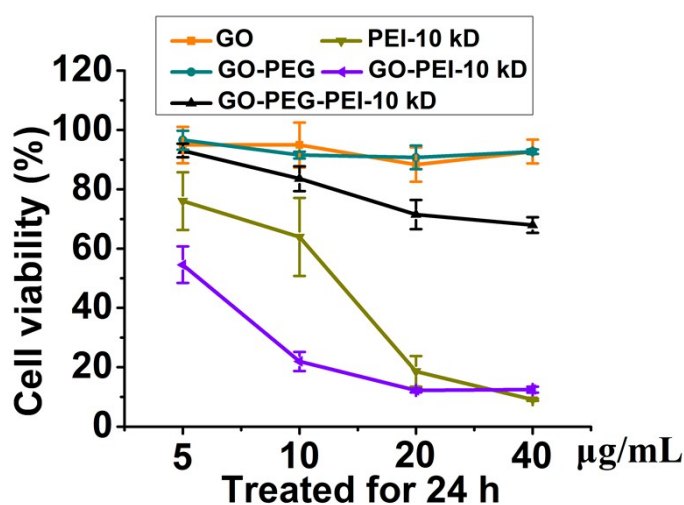

**Figure S1.** The cytotoxicity of GO and its derivatives to DCs treated for 24 h.

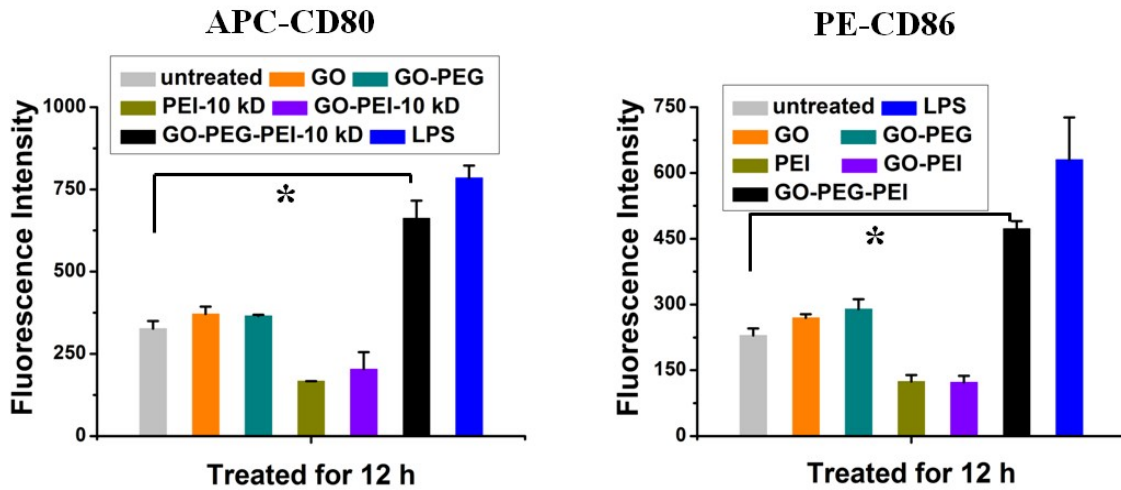

**Figure S2.** GO-PEG-PEI could effectively up-regulate the expressions of CD80 and CD86 on DCs, achieving levels comparable to those triggered by LPS. It was gated from CD11c<sup>+</sup> cells and then the fluorescence intensity was analyzed using FCS Express software.

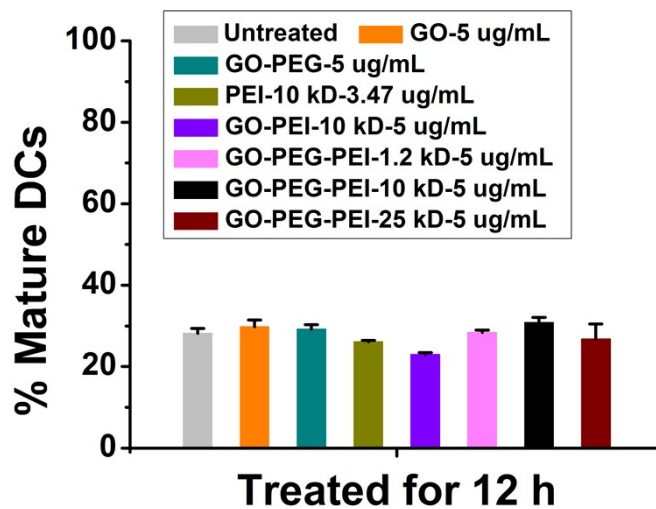

**Figure S3.** GO and its derivatives showed no activation on DCs maturation at low concentration.

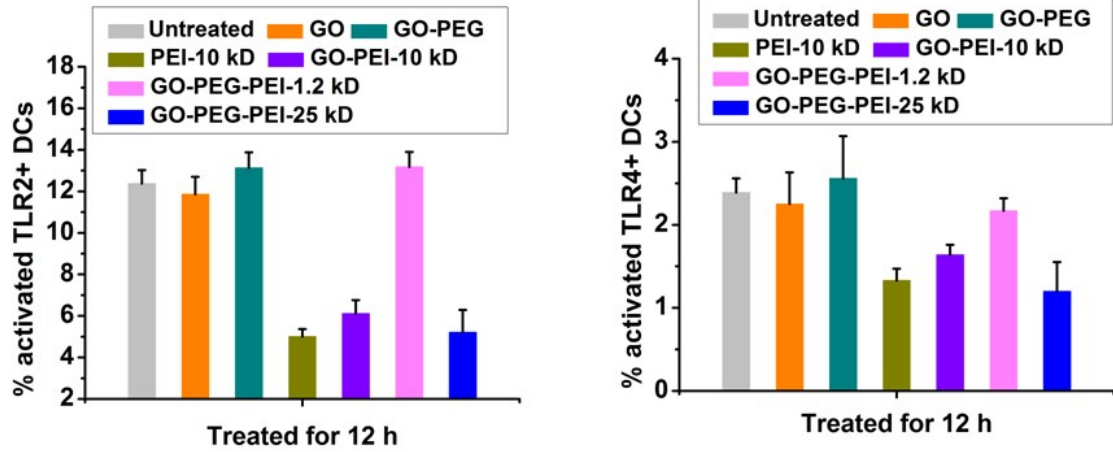

**Figure S4.** The effects of GO and its derivatives on TLR2 and TLR4 signaling pathways.

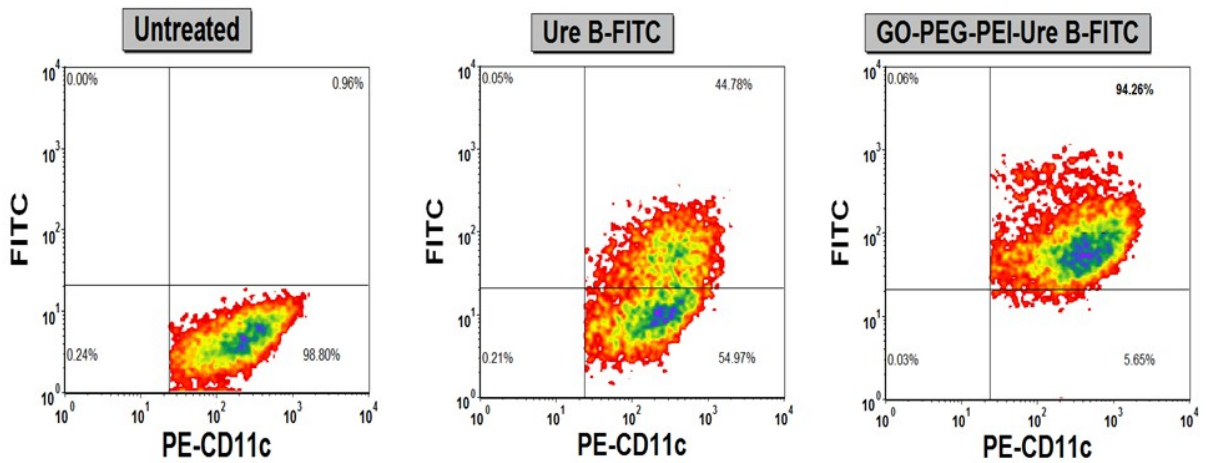

**Figure S5.** More DCs engulfed Ure B when treated with GO-PEG-PEI-Ure B than free Ure B.

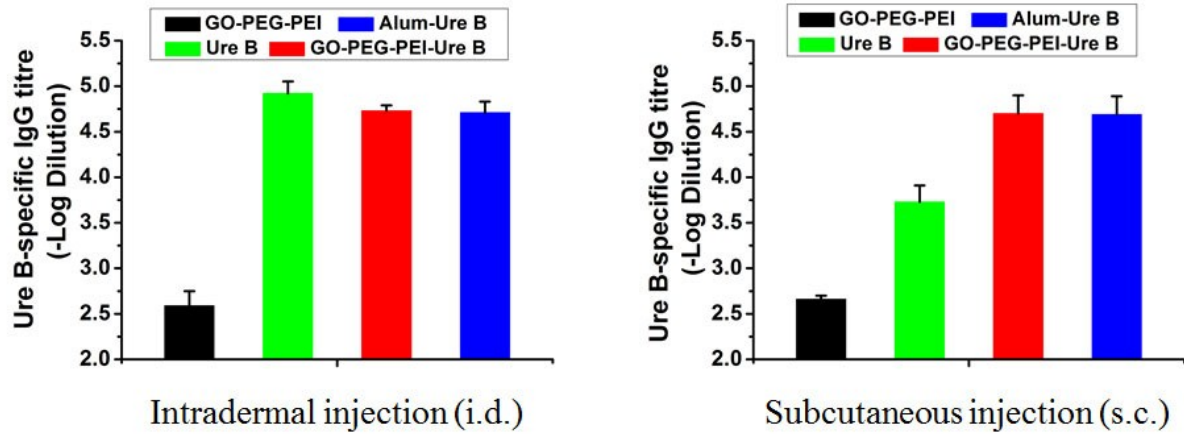

**Figure S6.** The effect of immunization routes on the humoral response induced by GO-PEG-PEI-Ure B.
